# Supplementary material for: Integrative pathway dissection of molecular mechanisms of moxLDL-induced vascular smooth muscle phenotype transformation
Source: PubMed Central journal article supplement (PMC3556327; doi:10.1186/1471-2261-13-4), 2013-01-16
Supplement: 1471-2261-13-4-S2.pdf [file 1471-2261-13-4-S2.pdf]

# Actin binding

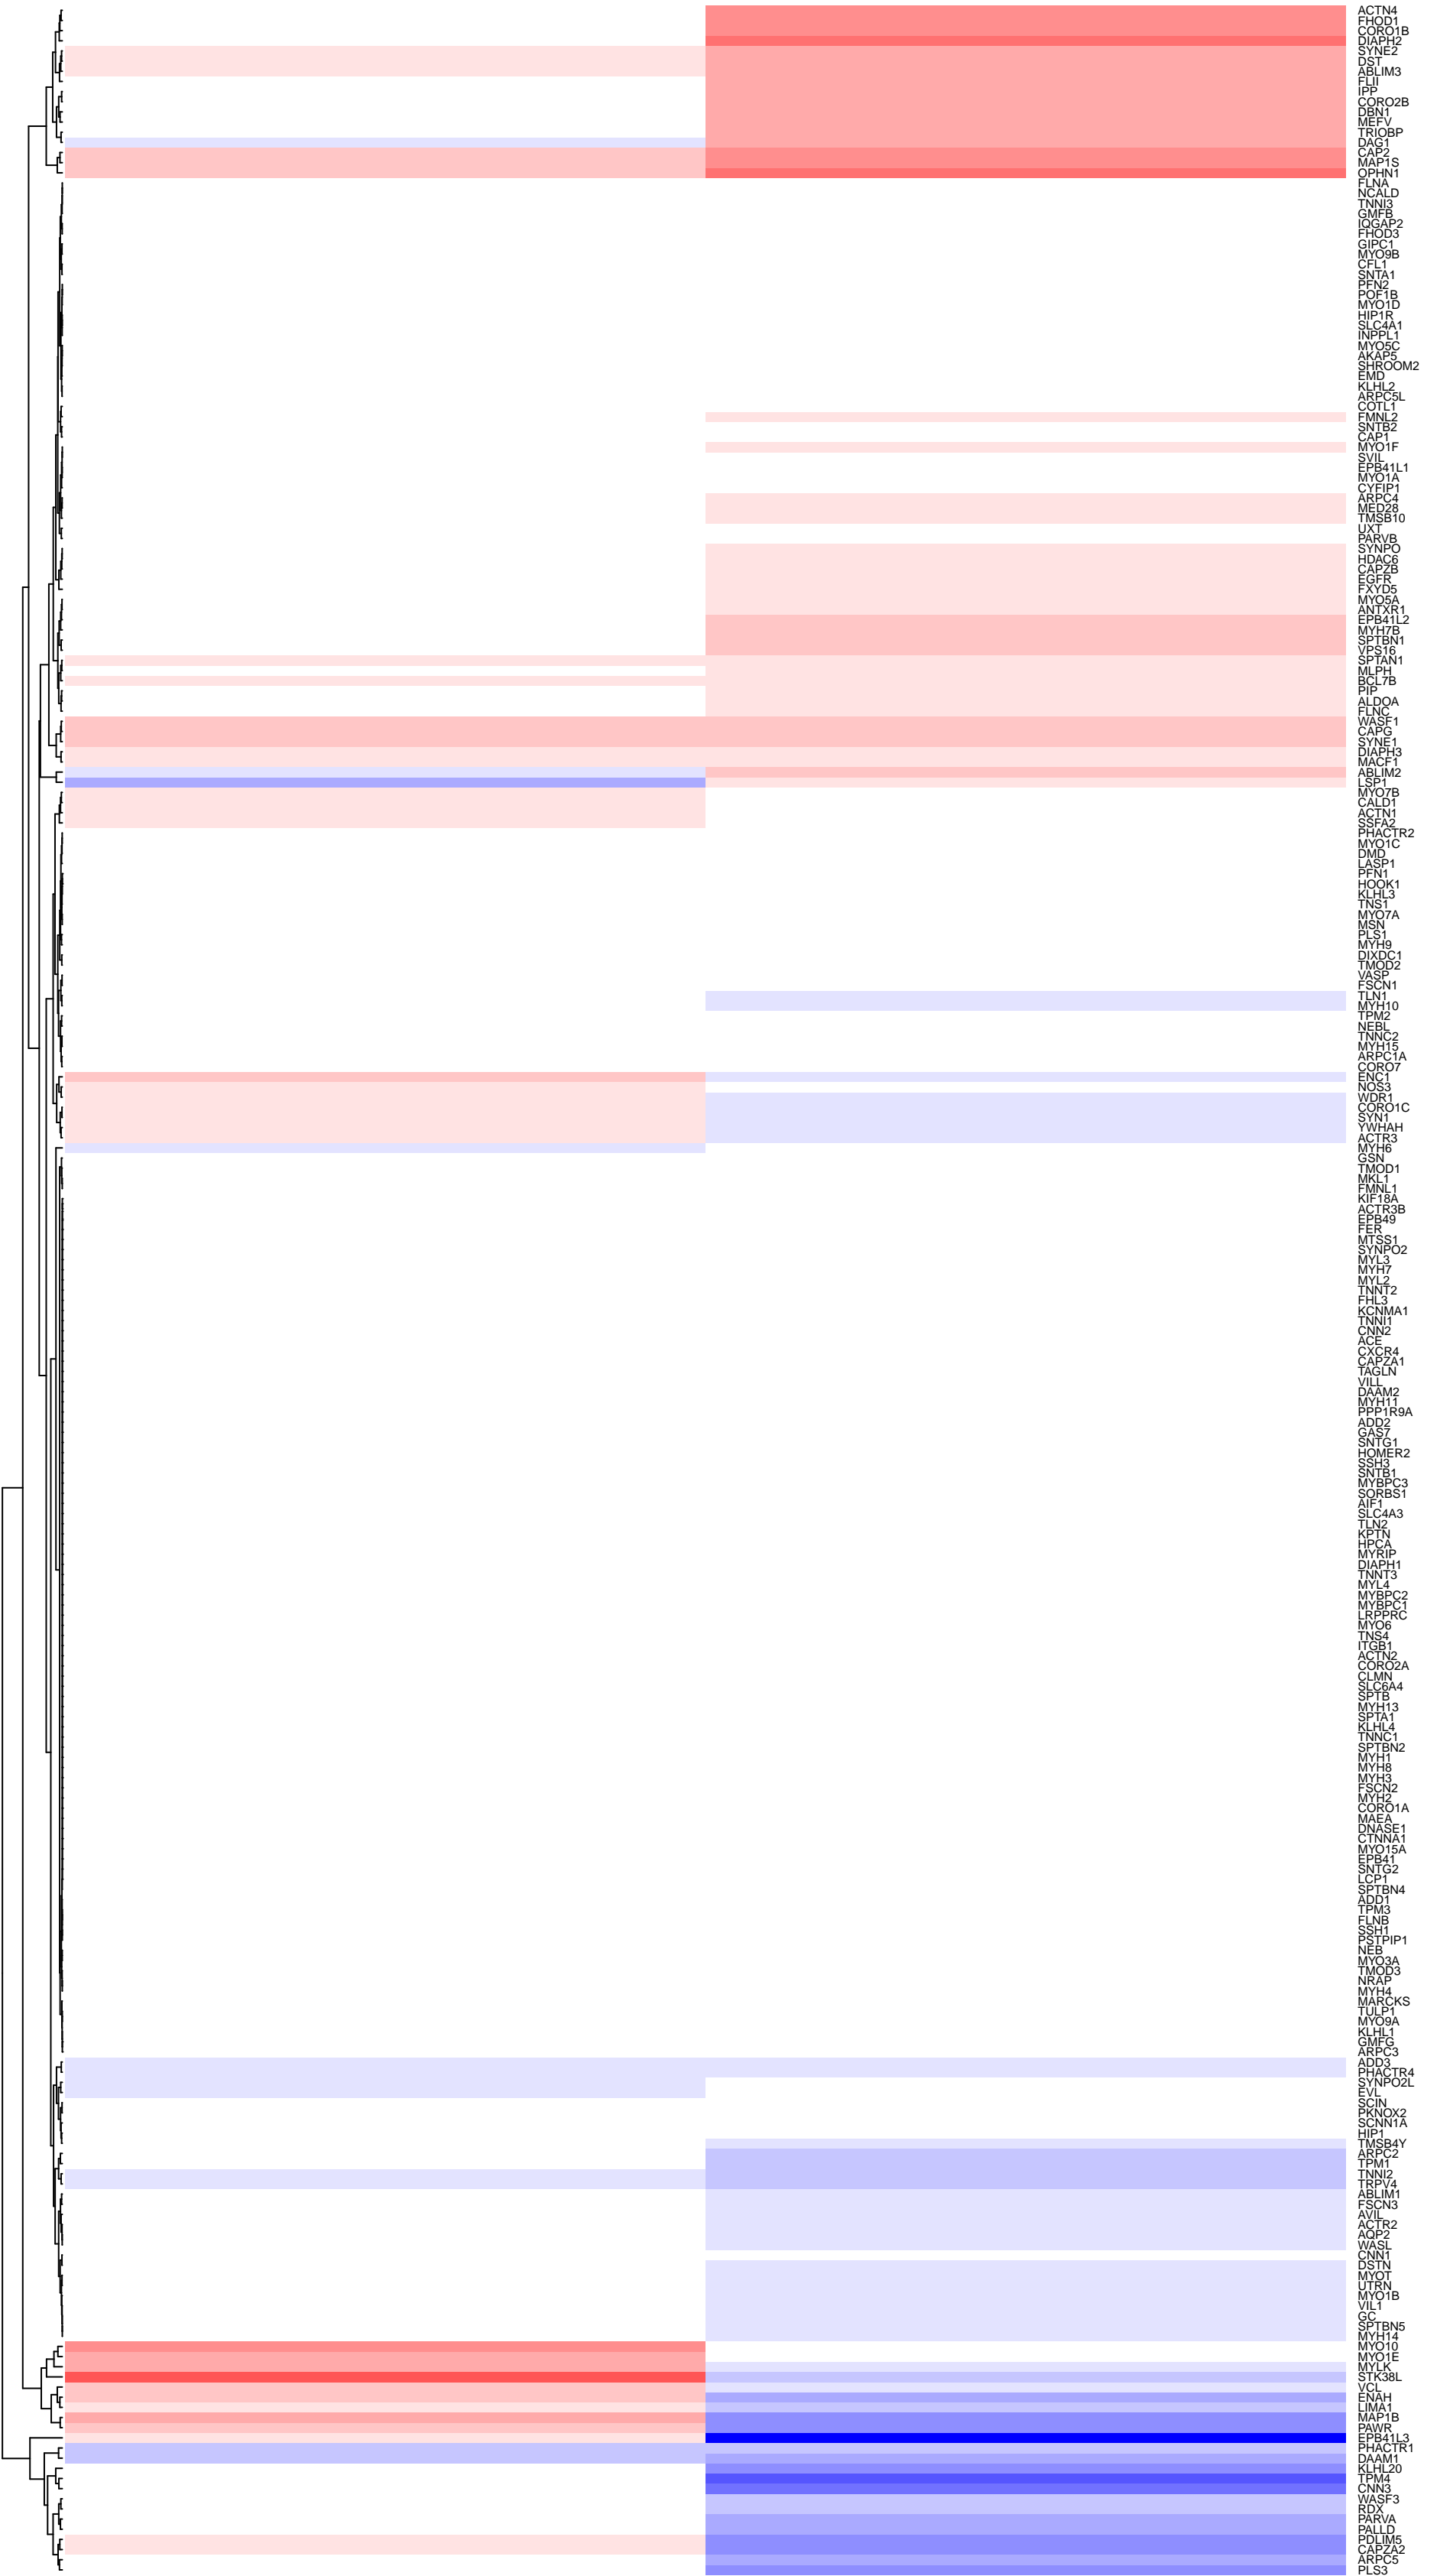





# Chromatin Organization

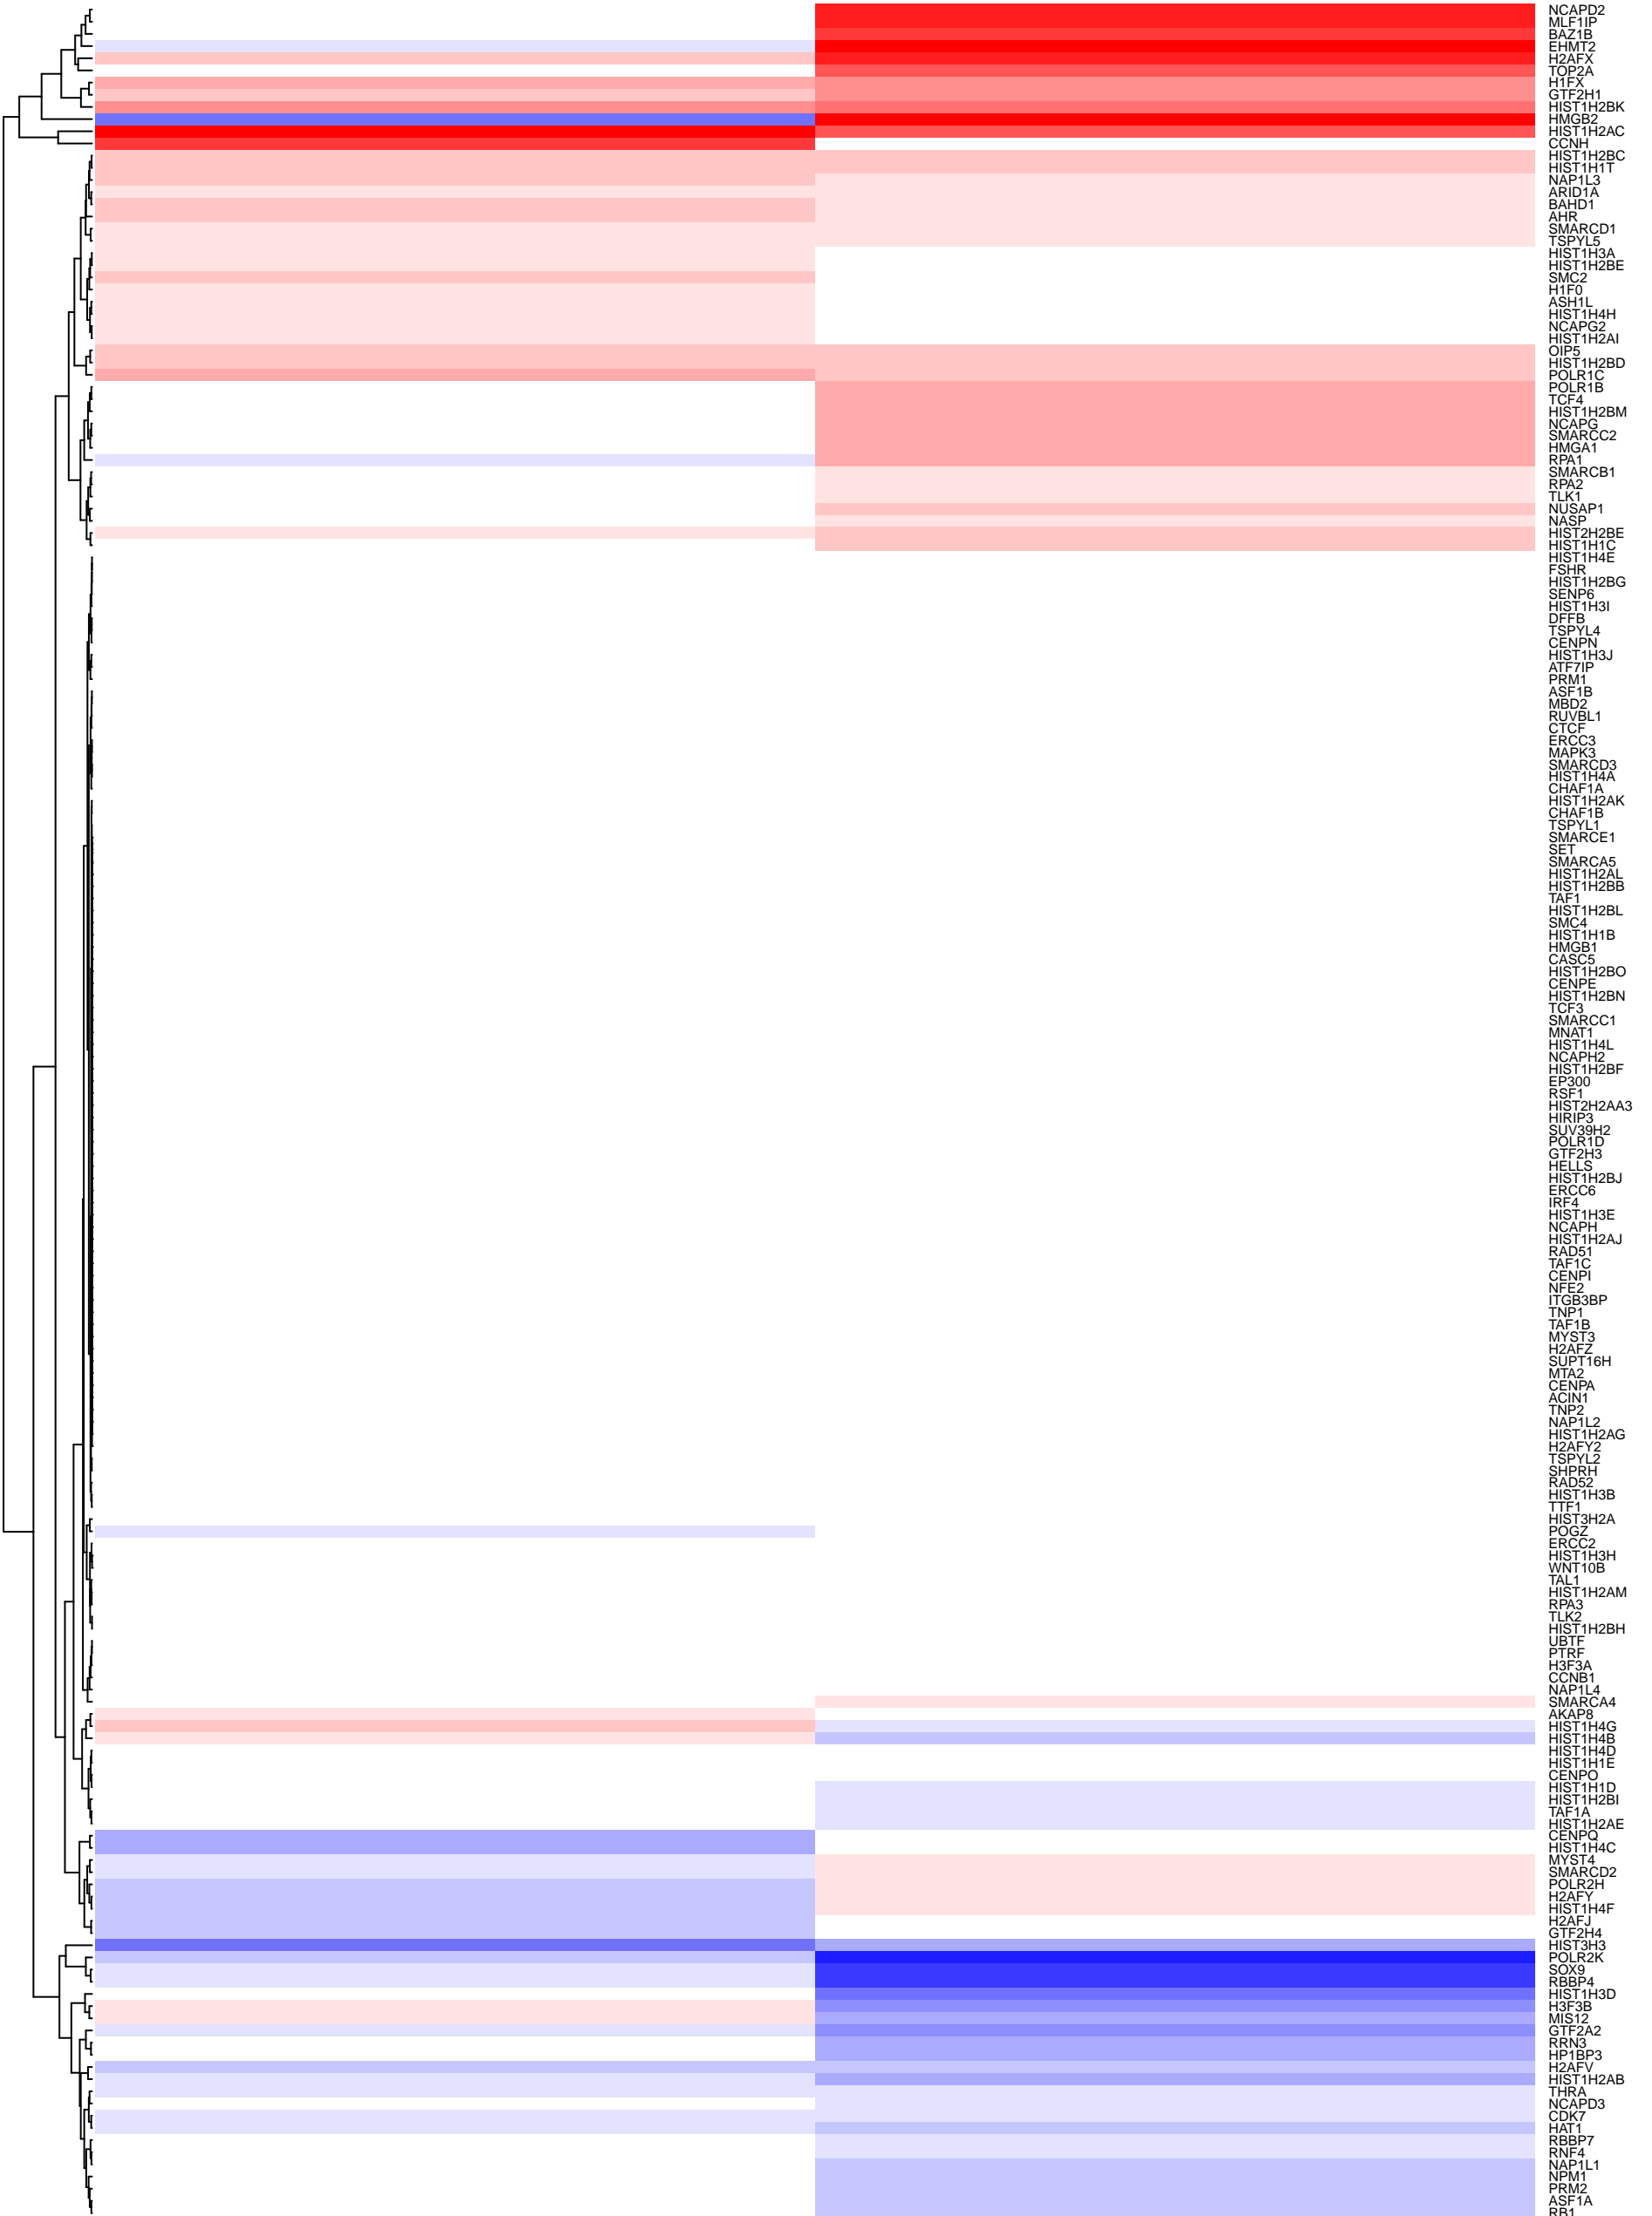

3h

21h

# ECM

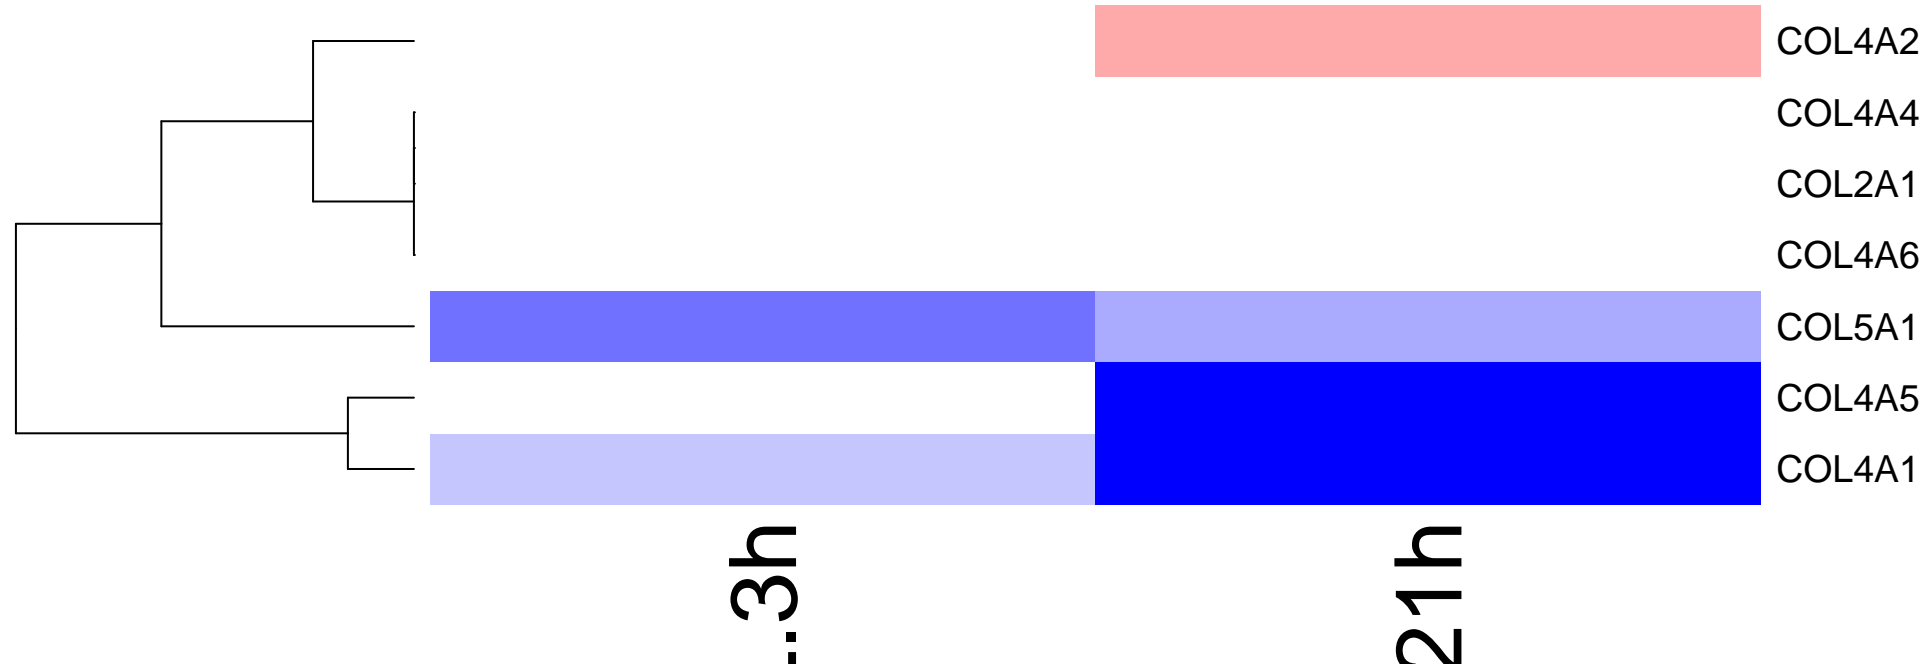

# EGFR1

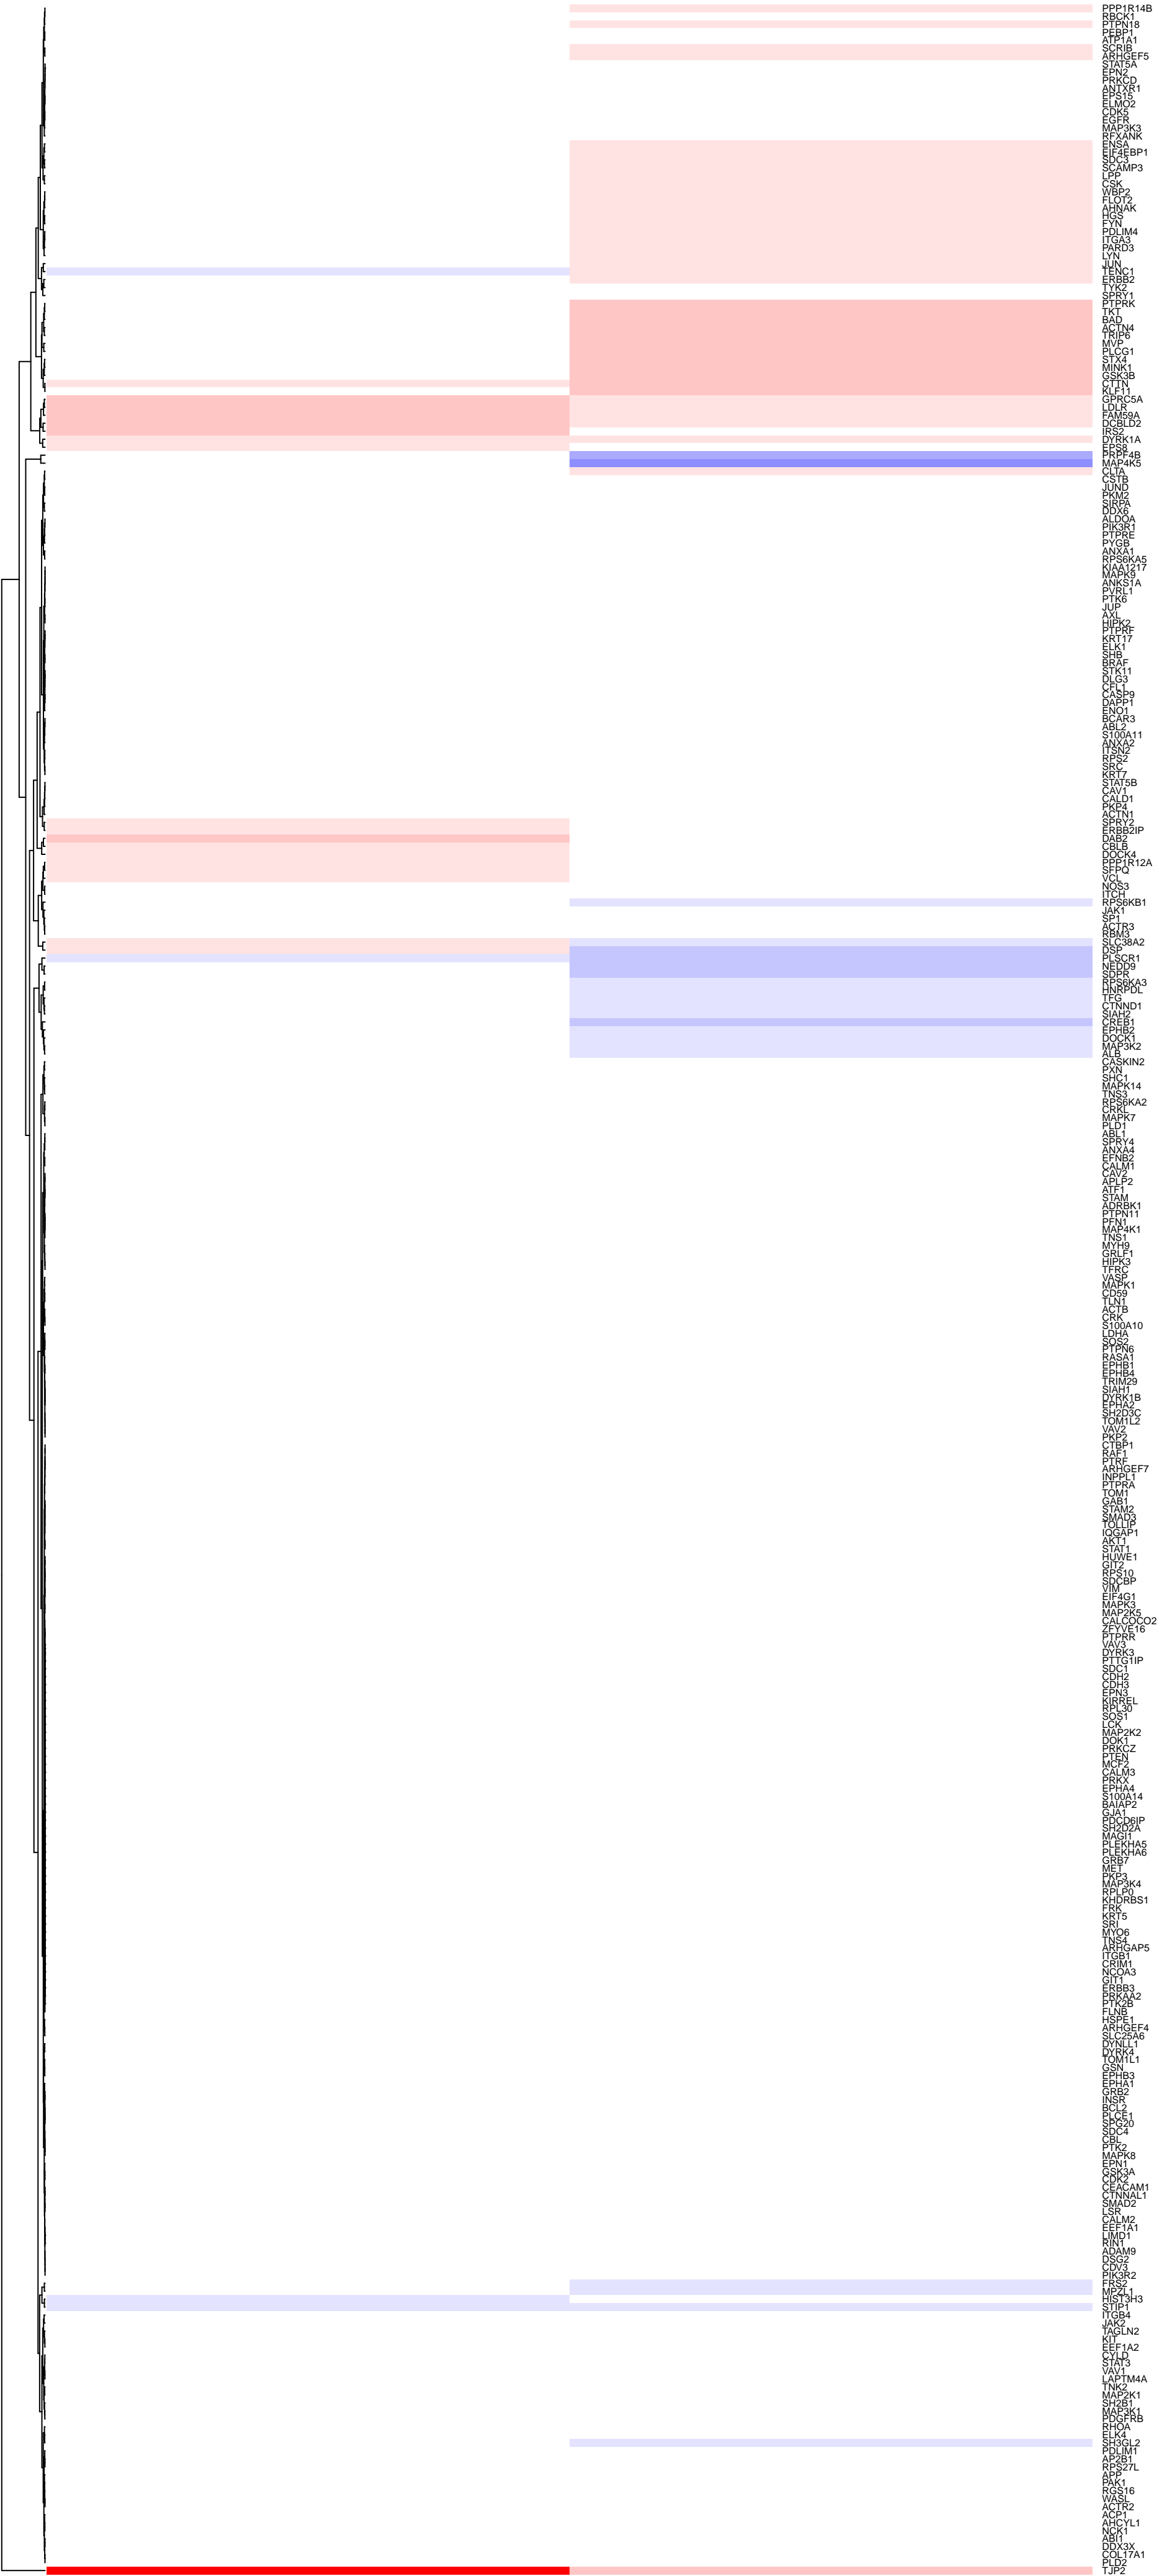

3h

21h

# Endopeptidase

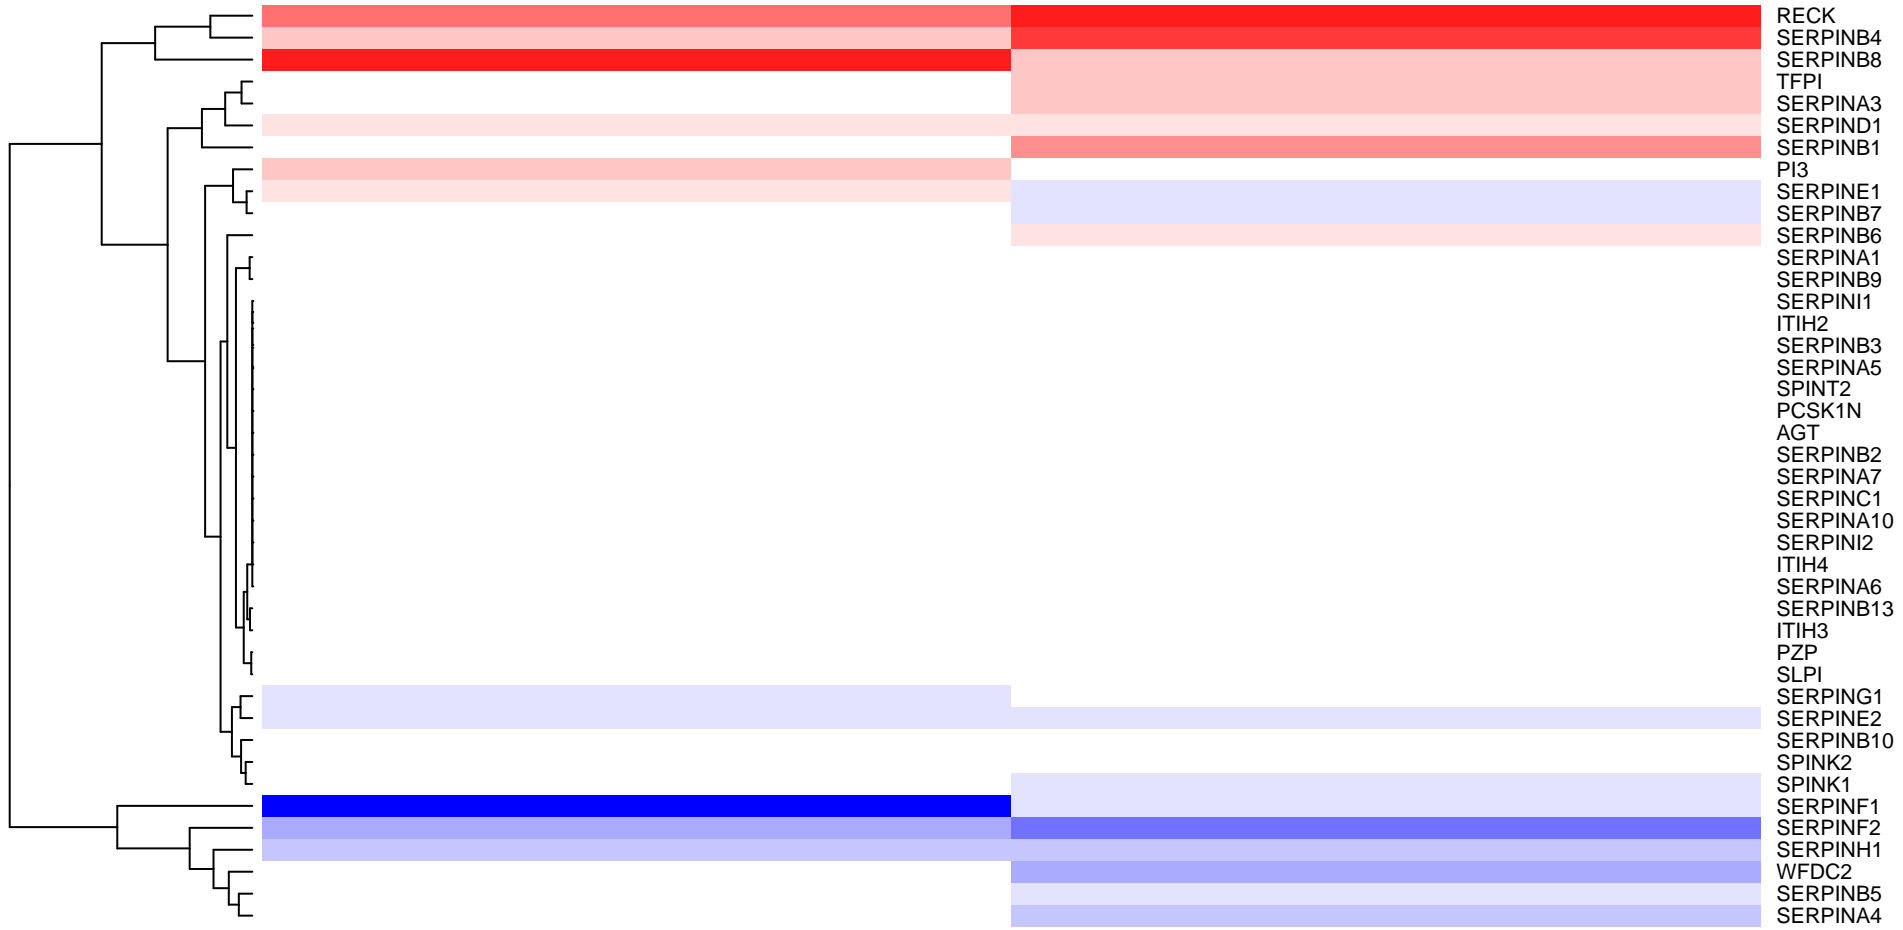

3h

21h





# Lysosome

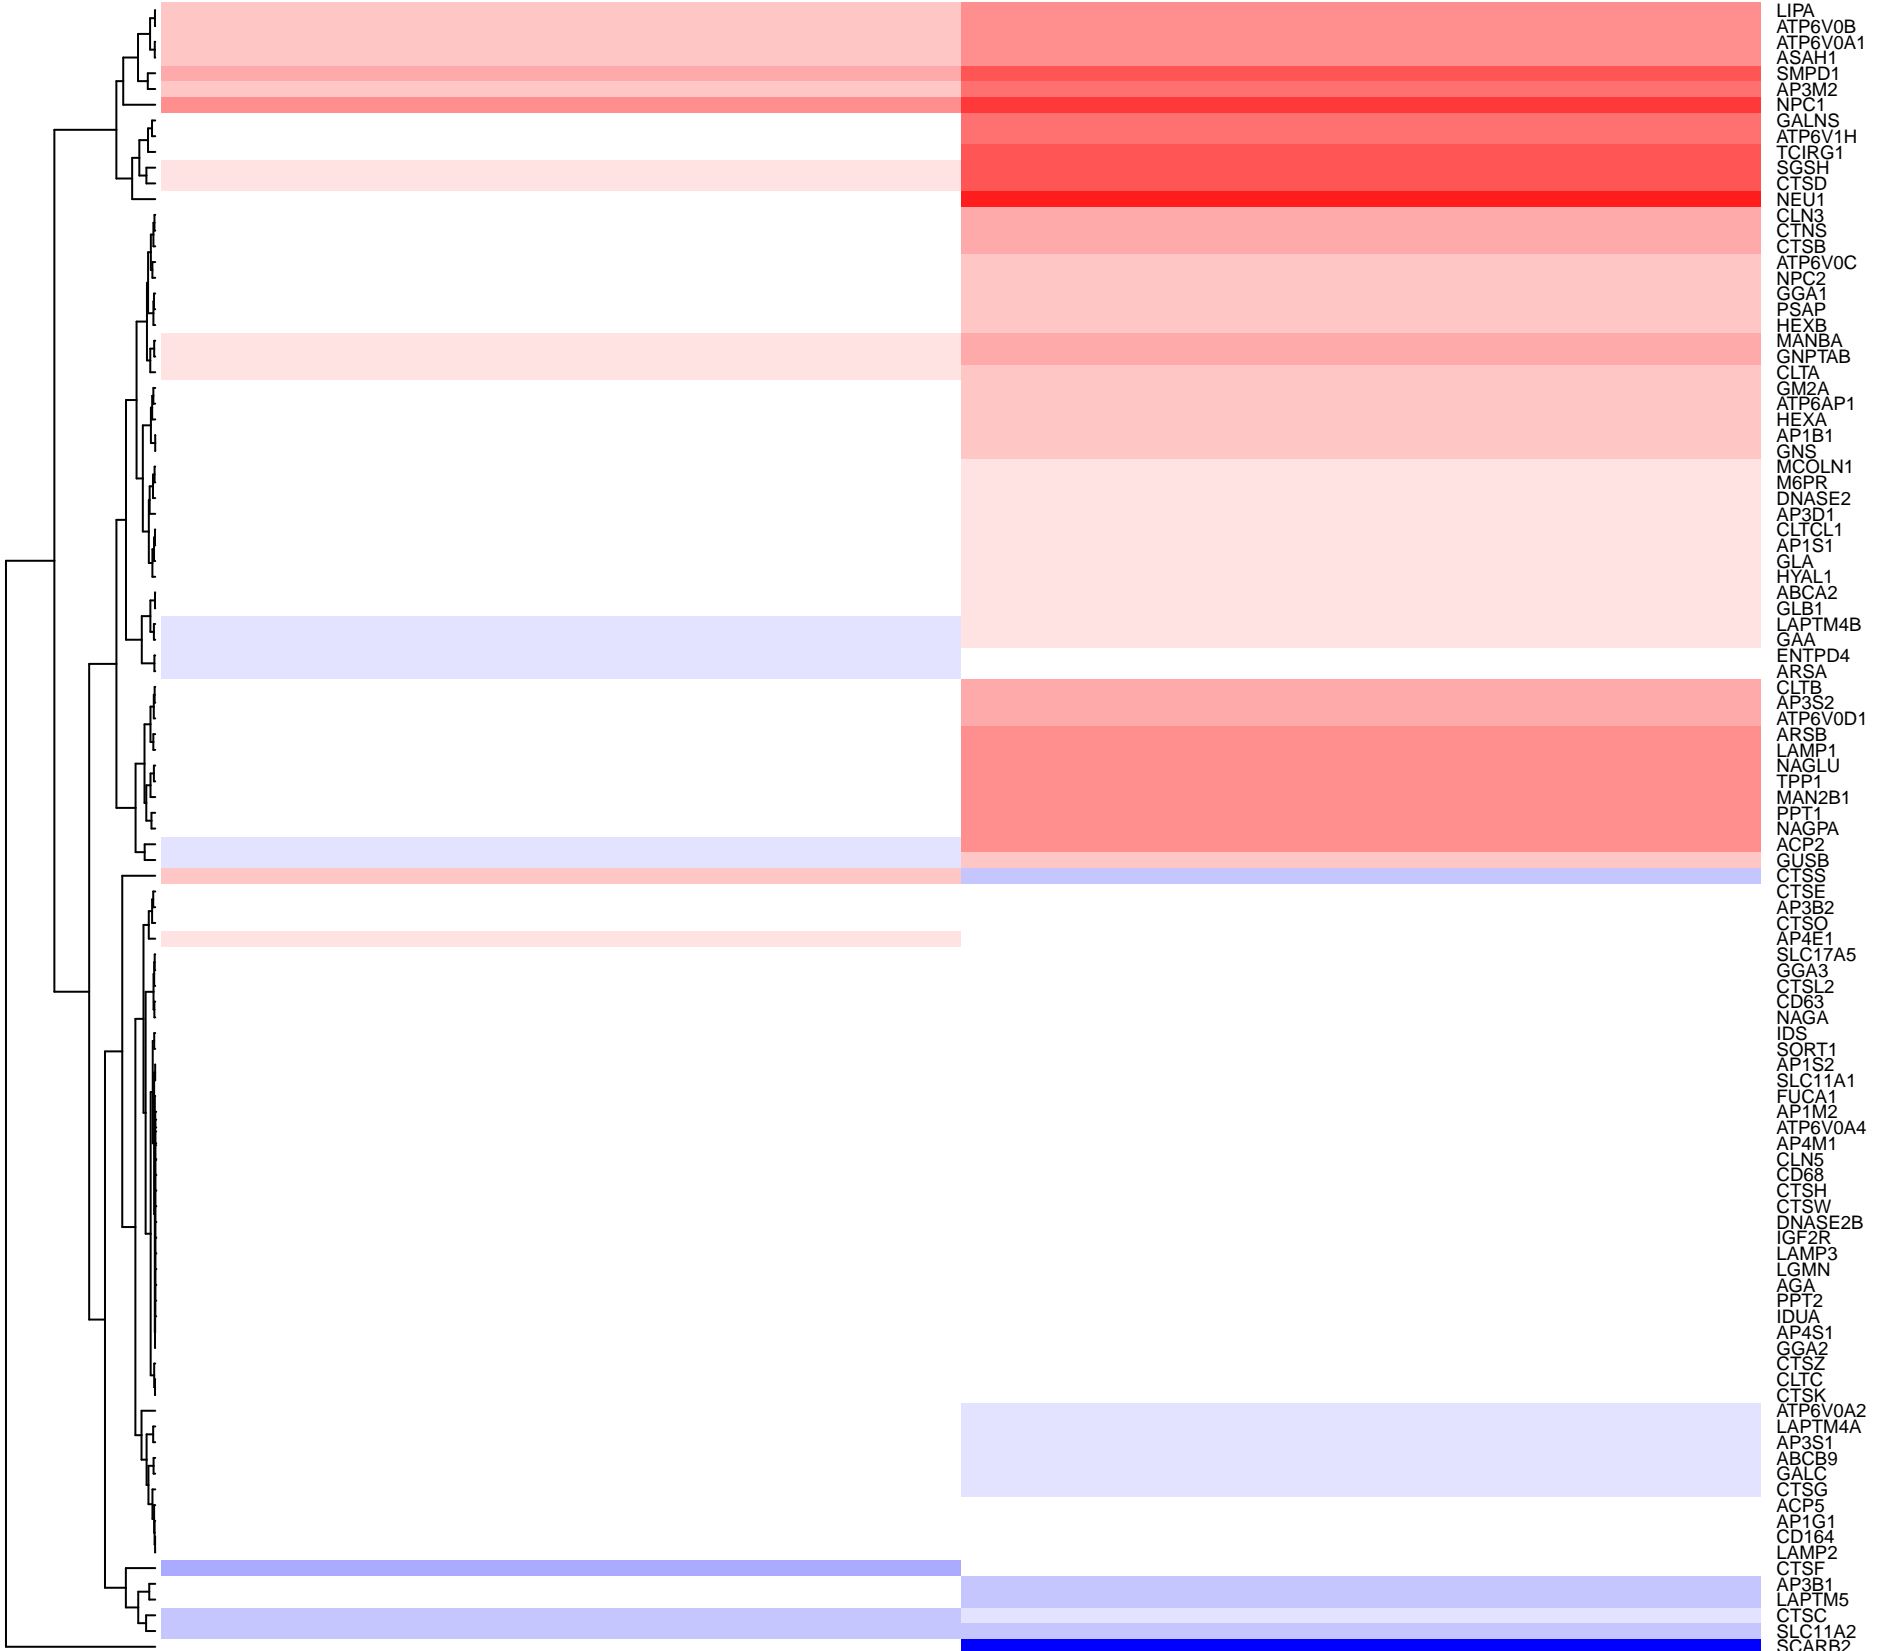

3h

21h

# Muscle function

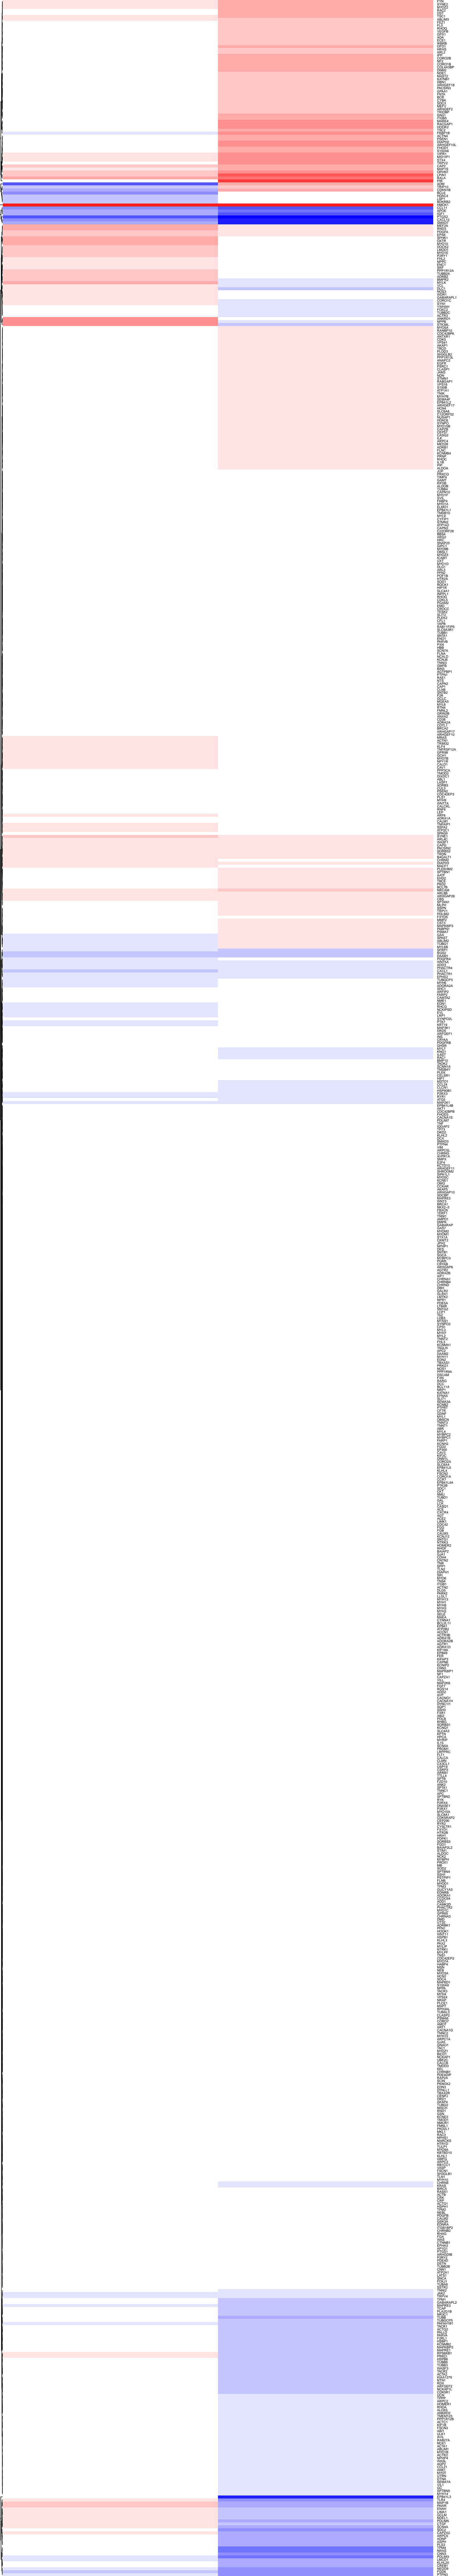

3h

21h

# Olfactory

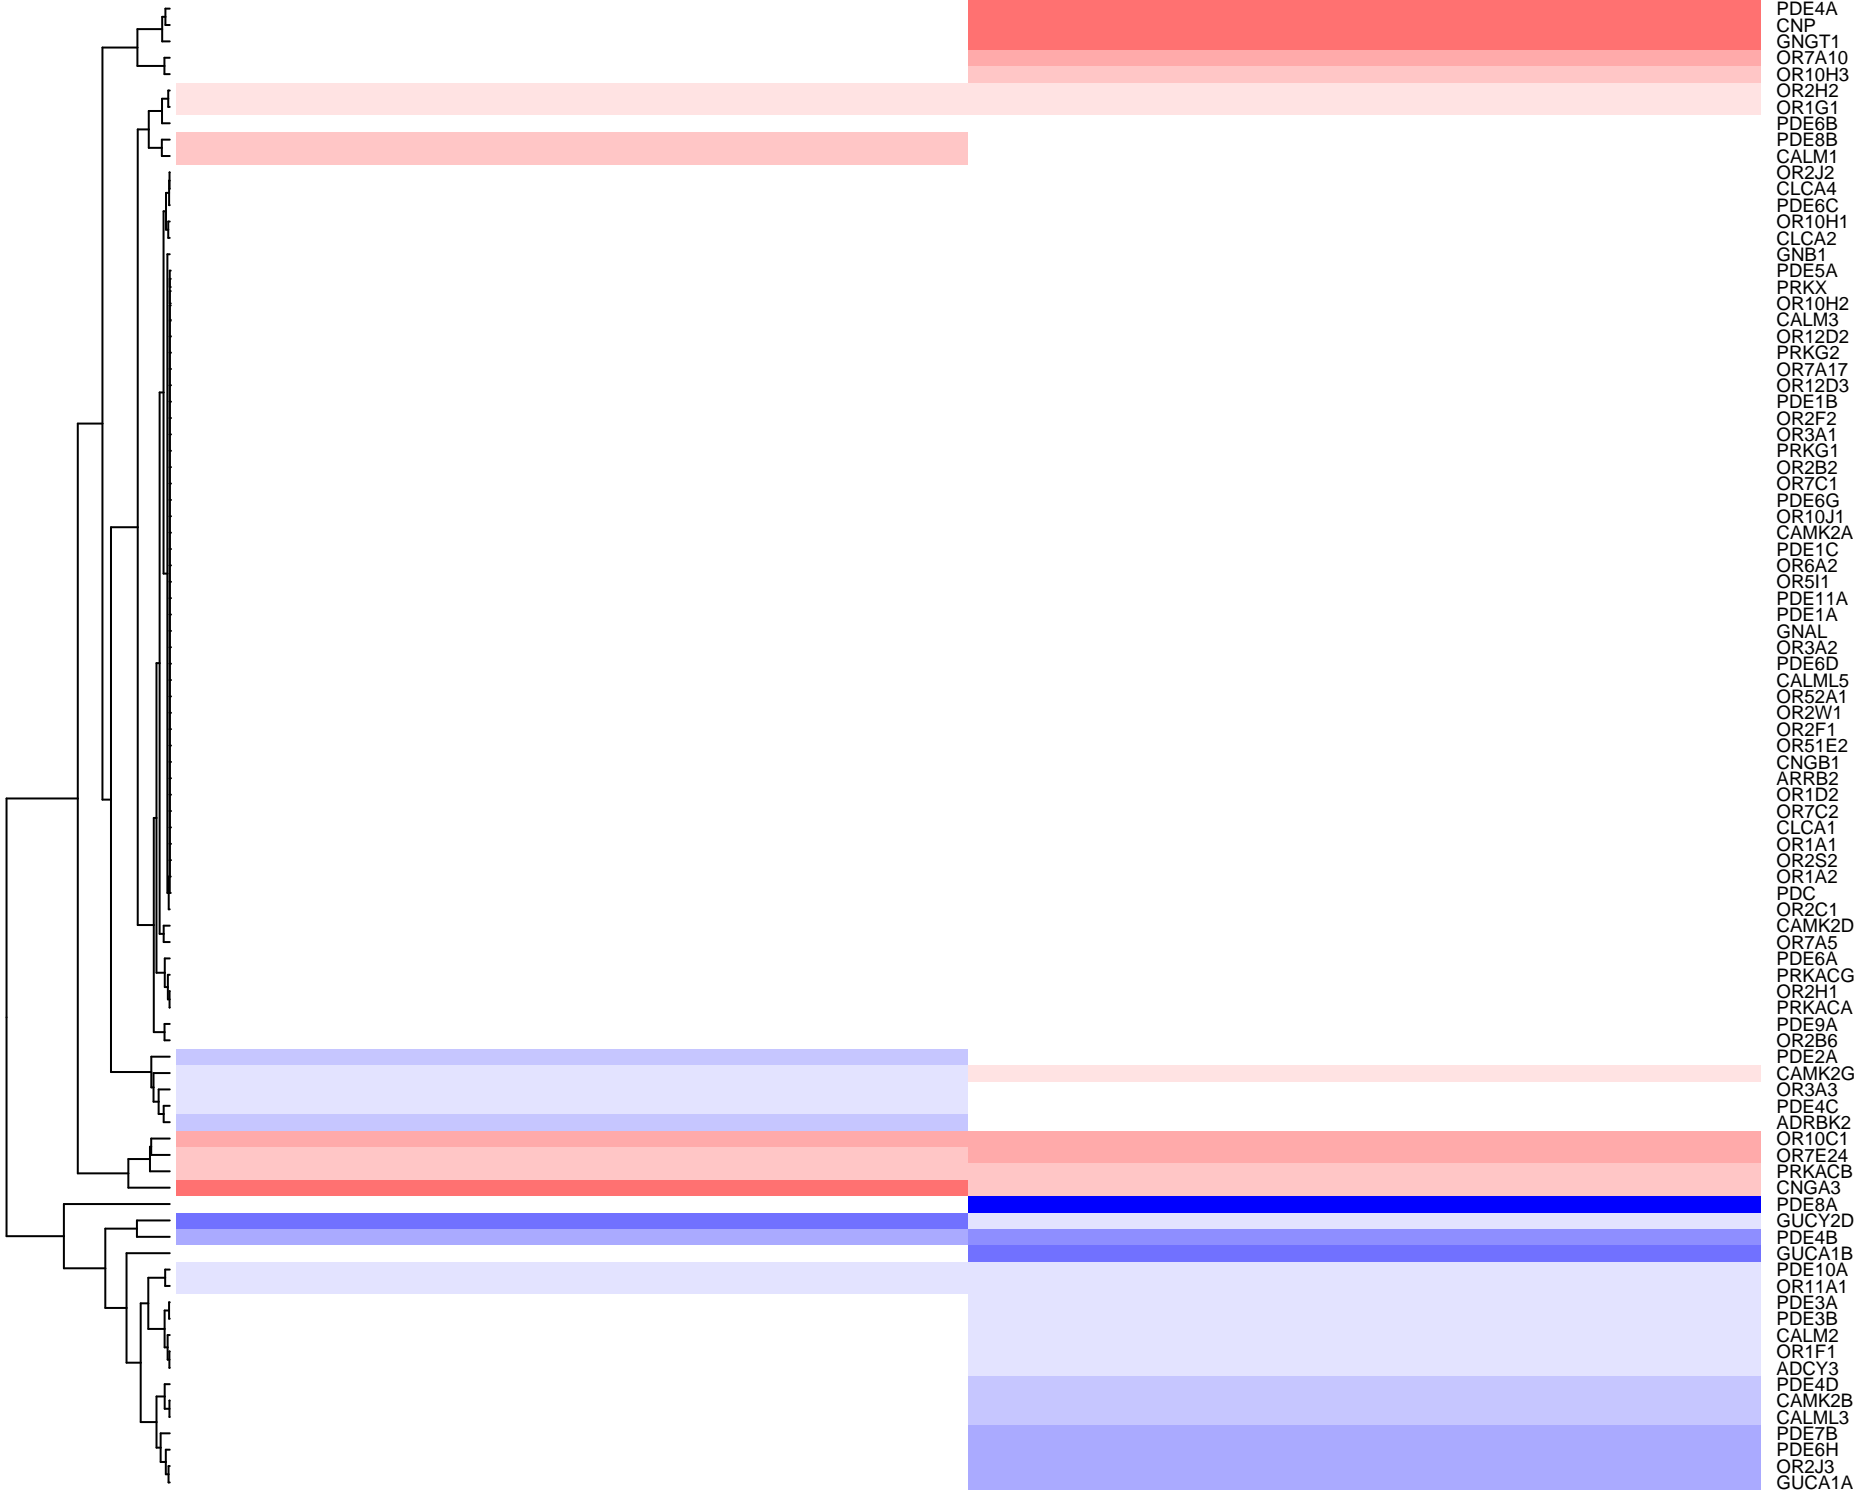

3h

21h

# Protein catabolism

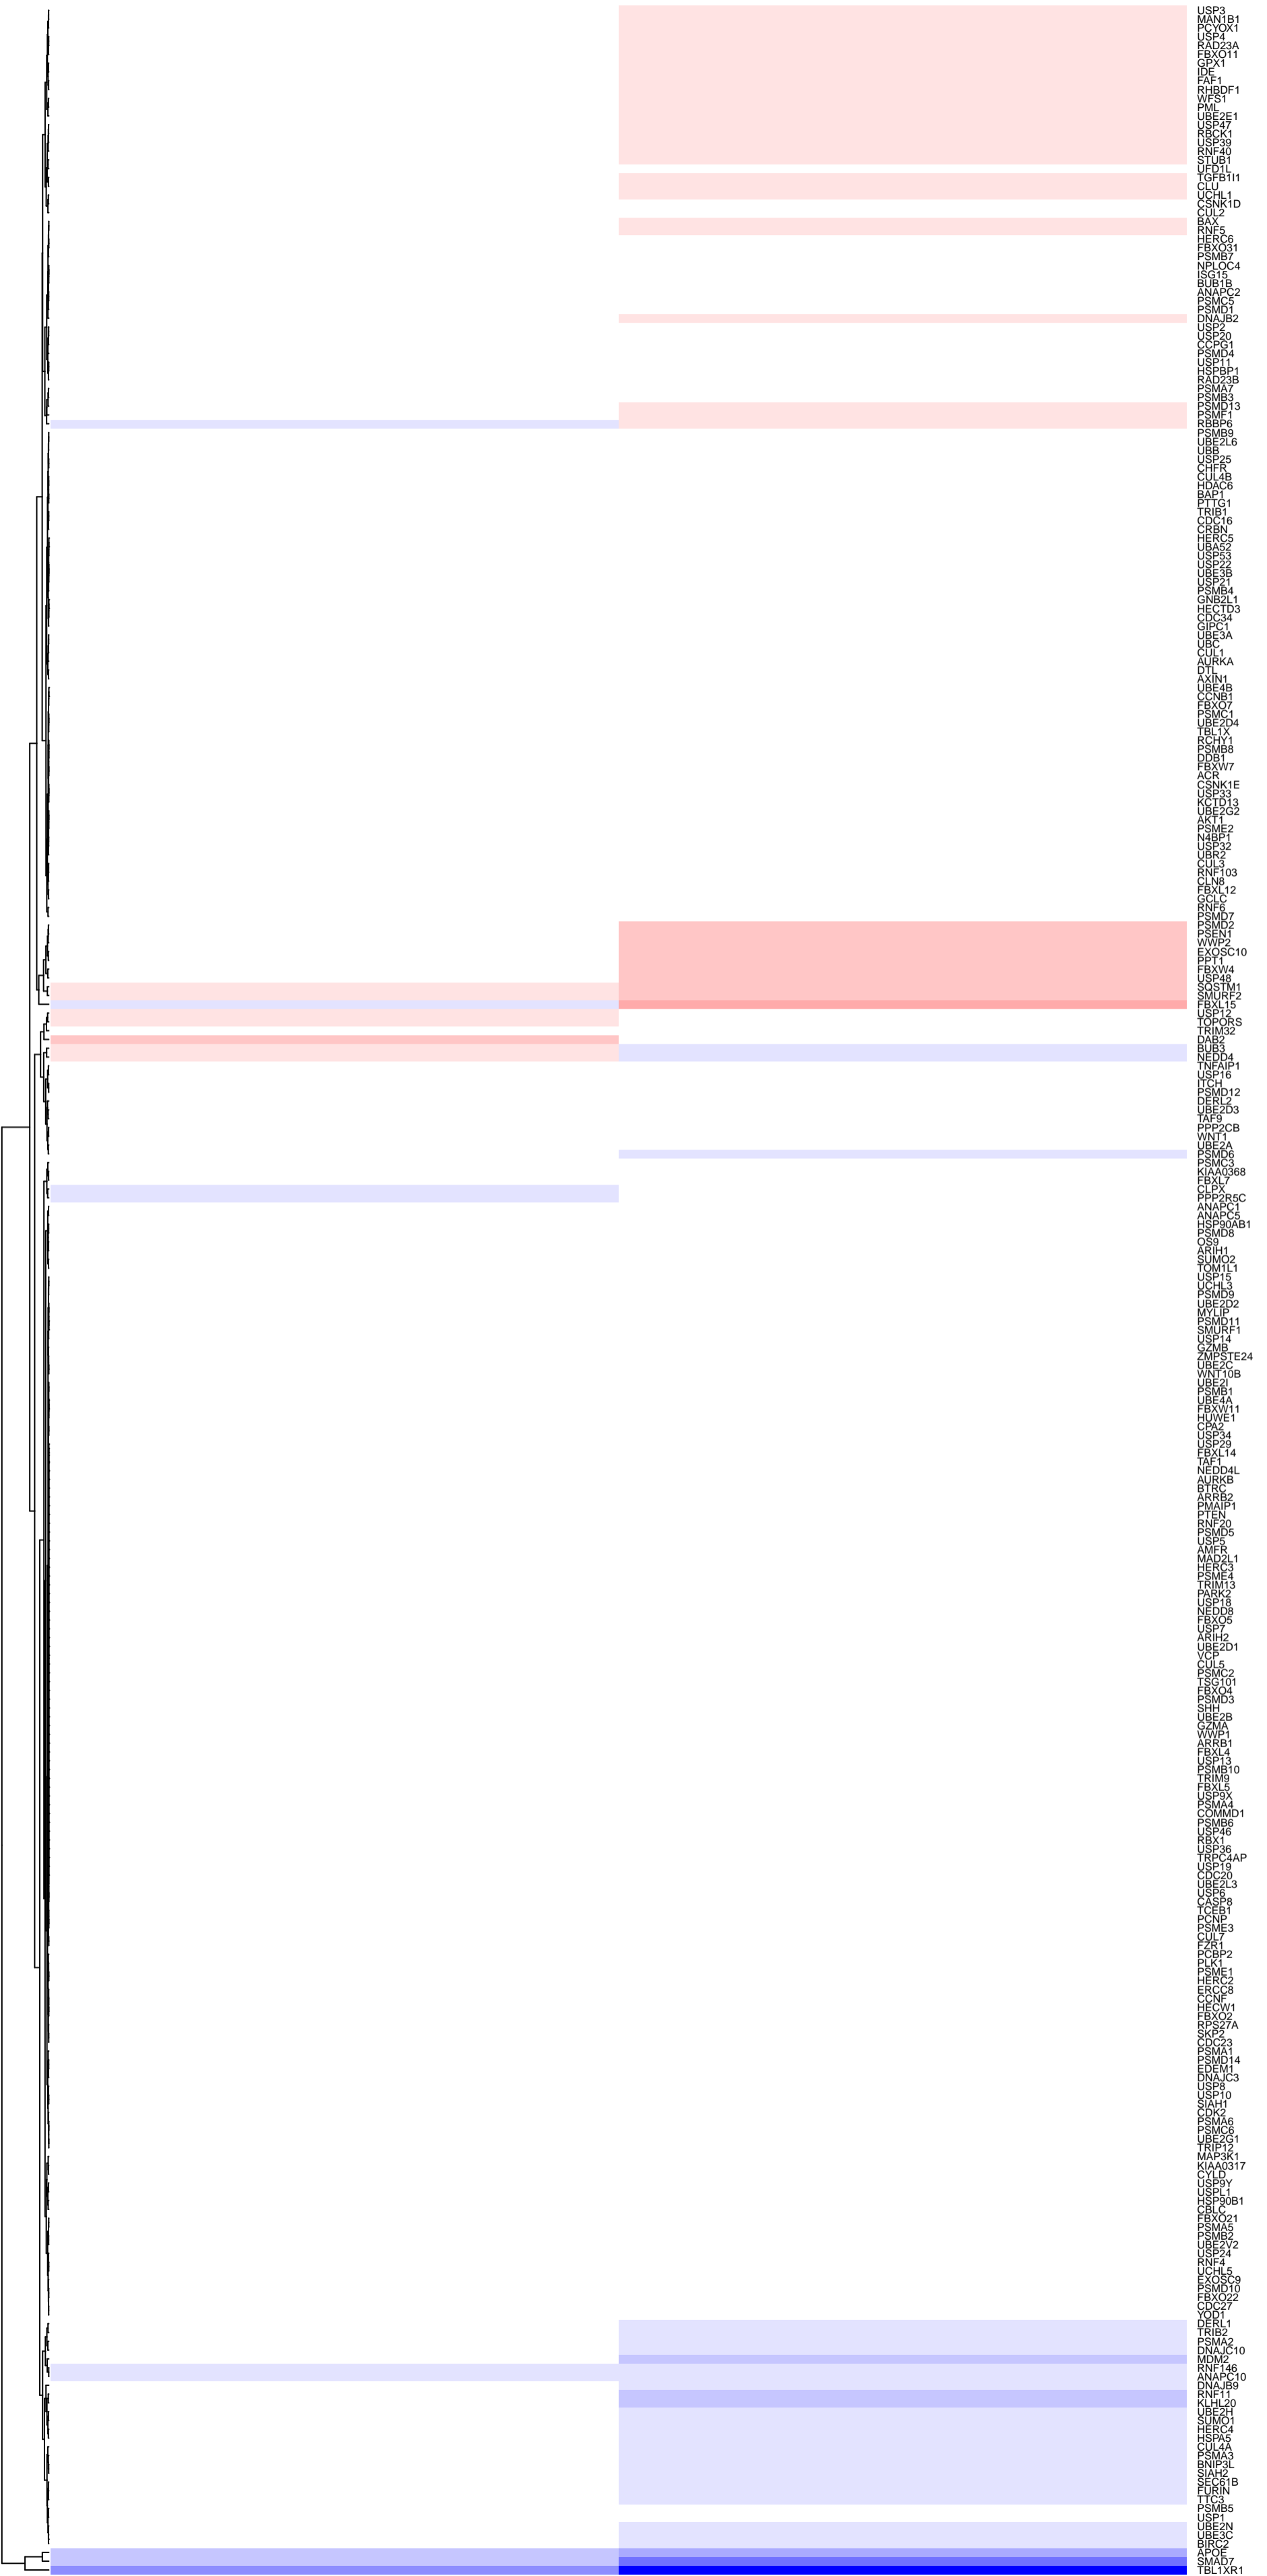

3h

21h

# Respiration

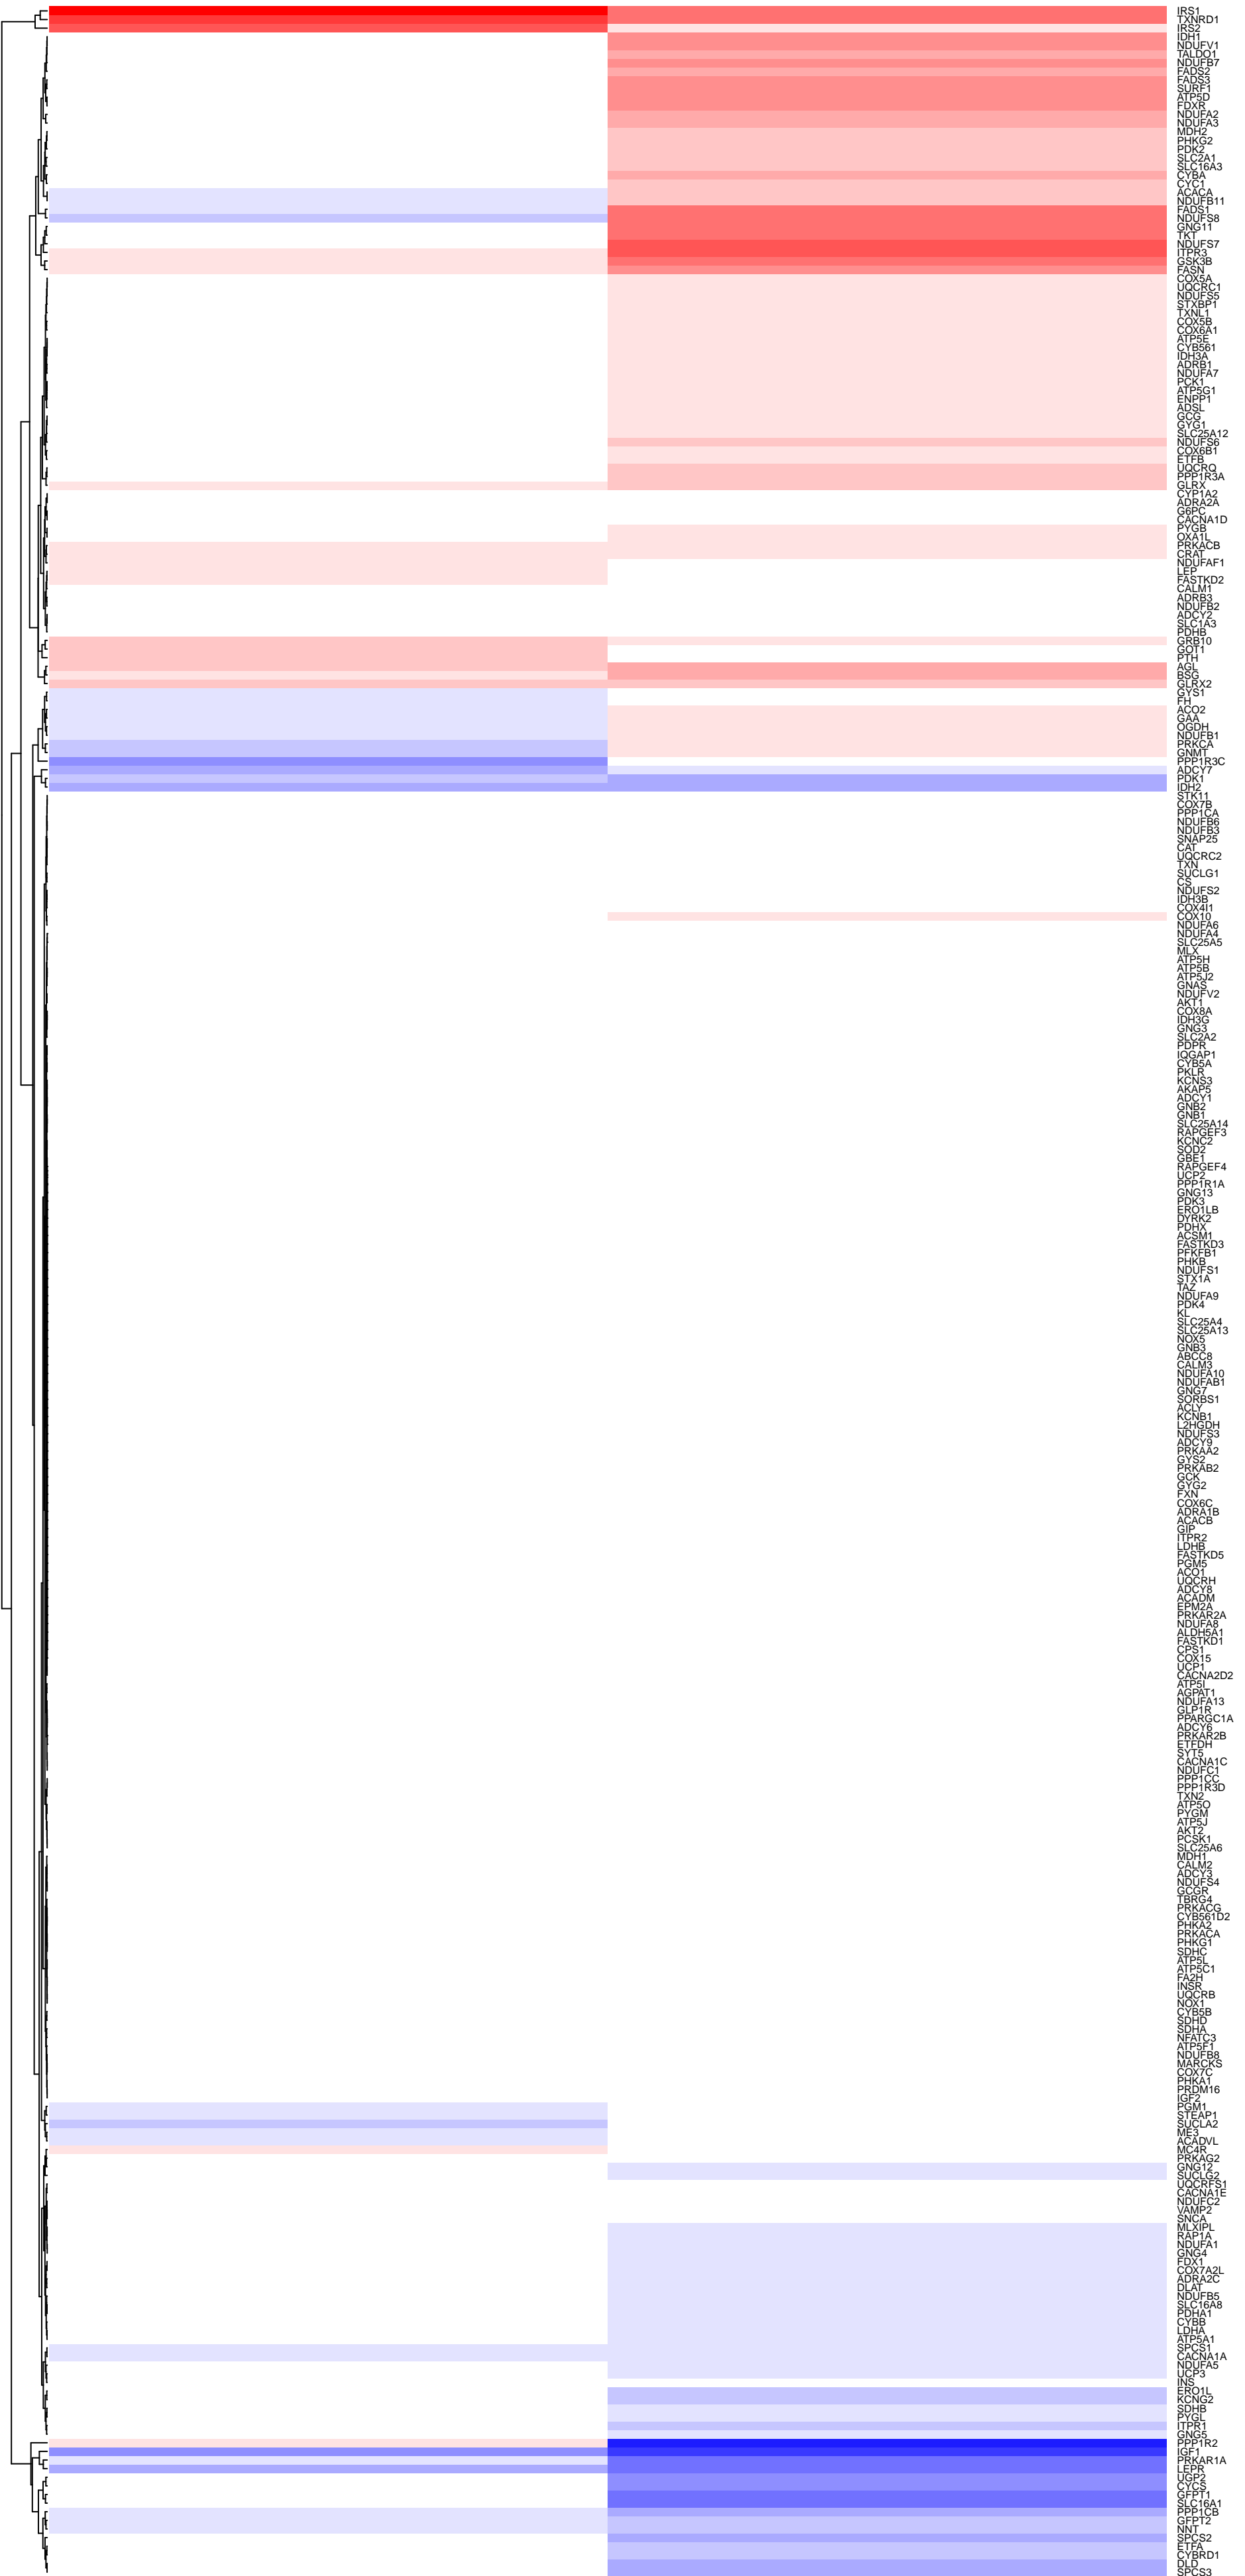

3h

21h

# TGF-beta

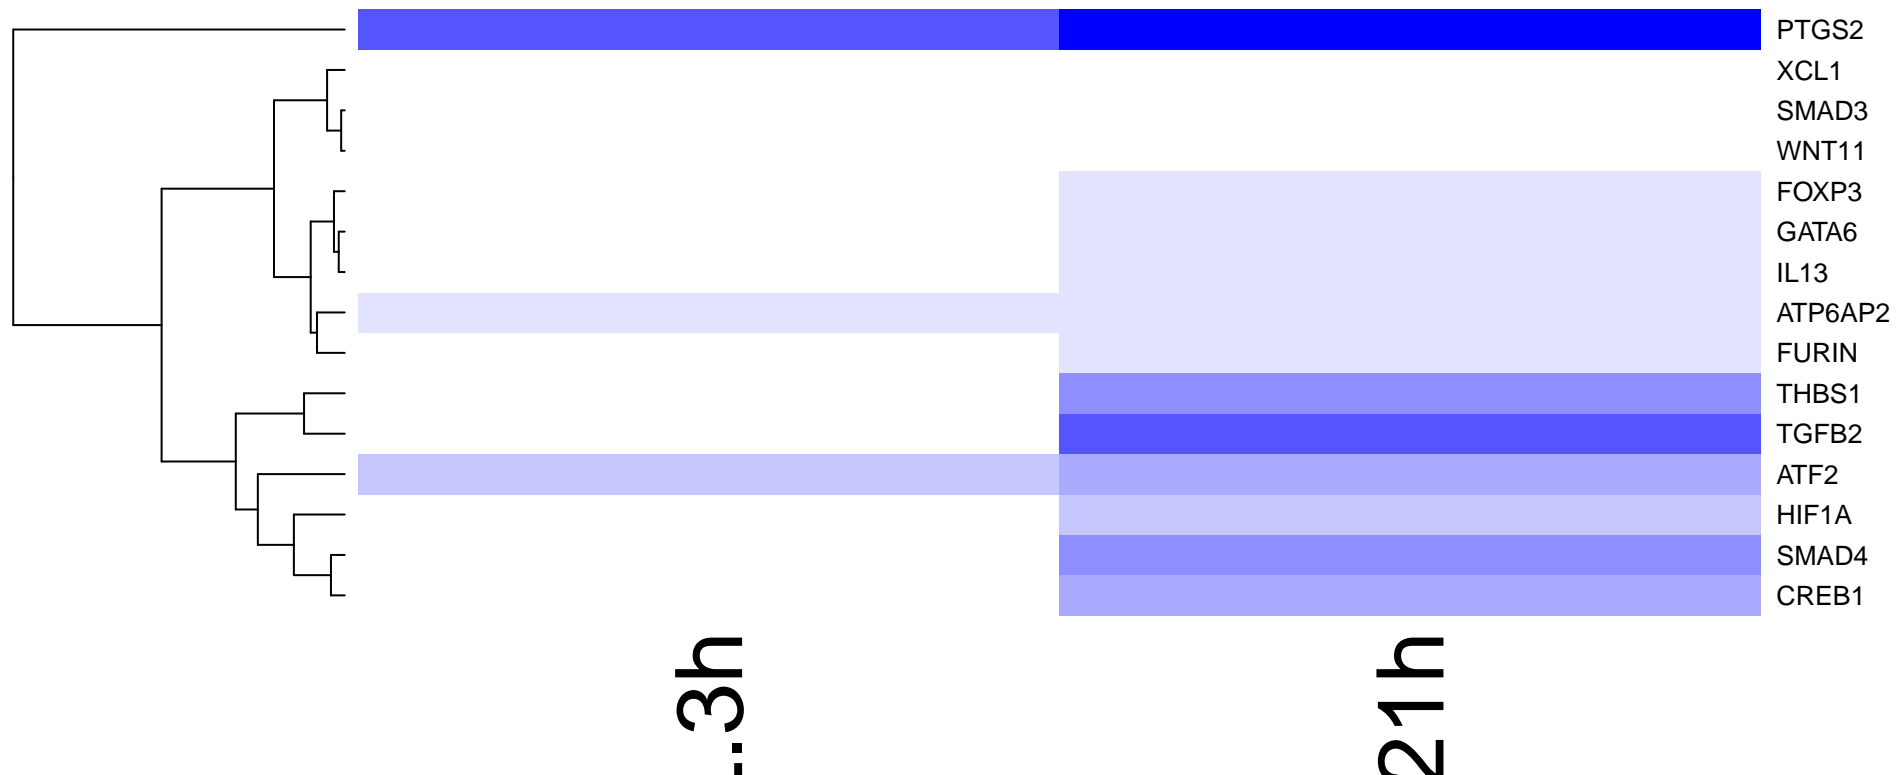

Translation

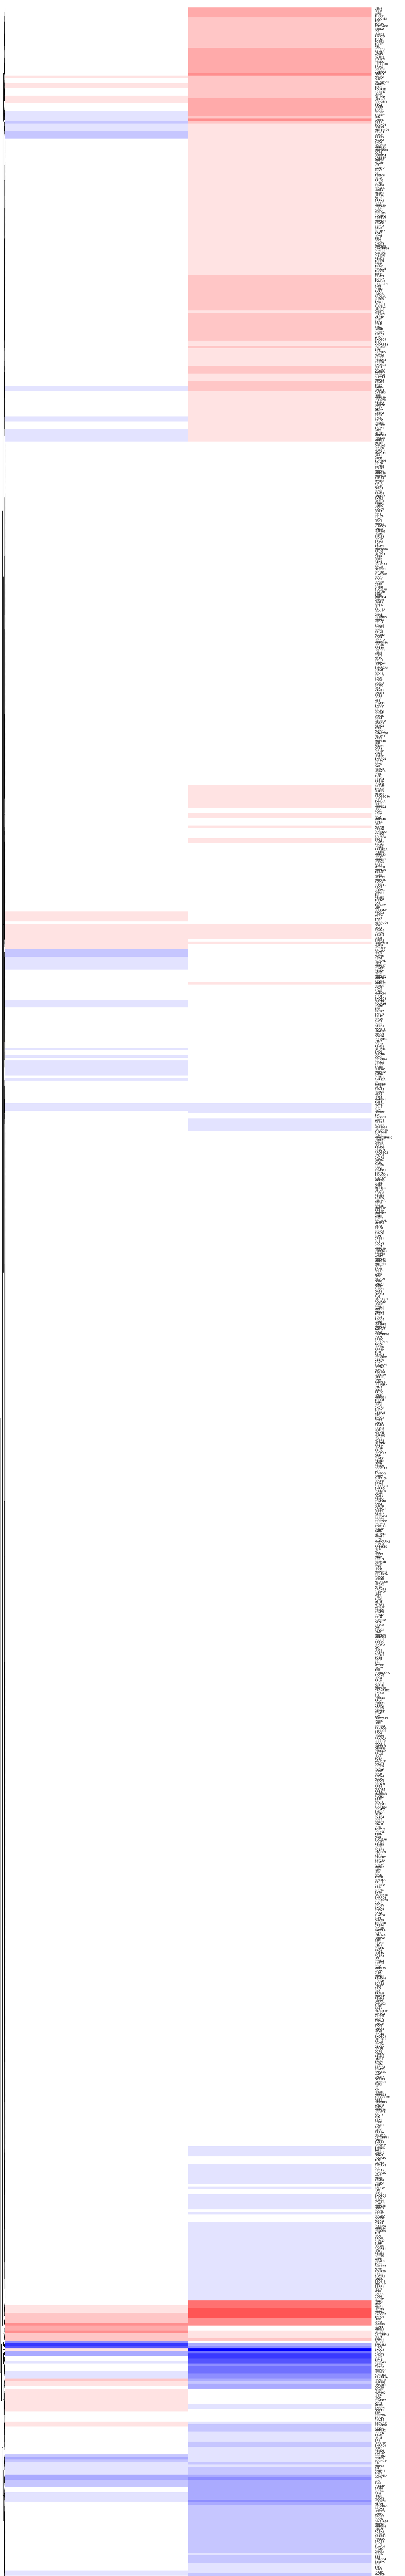

3h

21h
